# Supplementary material for: Organspende: Qualität durch Multiprofessionalität
Source: Springer Nature journal article supplement (doi:10.1007/s41906-022-1217-9), 2022-02-01

## Abbildung 2

### zum Beitrag „Organspende: Qualität durch Multiprofessionalität“

von Svenja Teufert, Michelle Fröb, Max Großmann, Danny Petzoldt, Jean Schliewe, Svitlana Ziganshyna

PflegeZeitschrift (75) 3/2022, S. 16-19

**Abb. 2:** Vergleich Anzahl Gespräche zur Organspendebereitschaft am UKL in einem 3-monatigen Zeitraum in den Jahren 2018 bis 2021

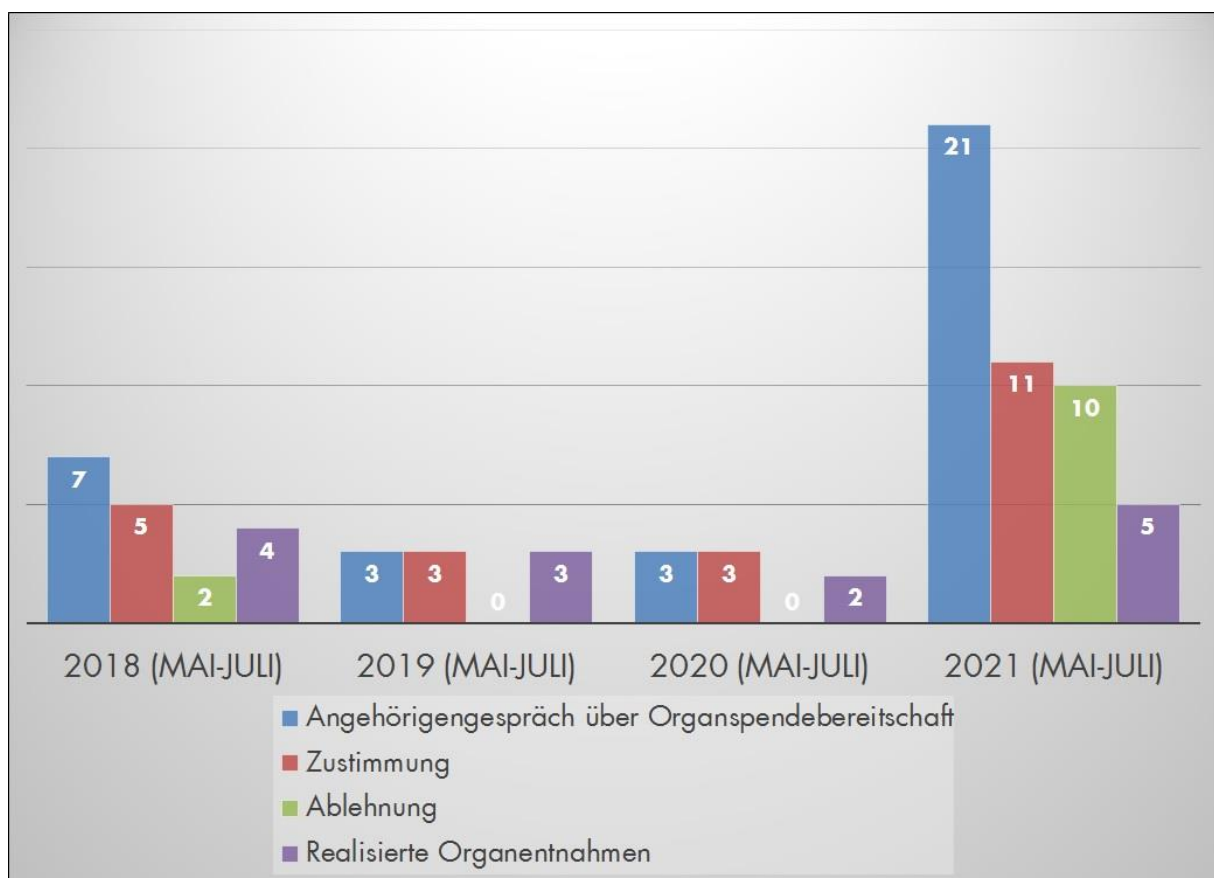

Supplement: MOESM1 [file 20132648]
